# Supplementary material for: Cervical Lymph Node Metastasis in High-Grade Transformation of Head and Neck Adenoid Cystic Carcinoma: A Collective International Review
Source: Springer Nature journal article supplement (doi:10.1007/s12325-016-0298-5), 2016-02-19
Supplement: MOESM1 [file 9203694]

- High-grade transformation in adenoid cystic carcinoma (AdCC-HGT) is a relatively recent but increasingly recognized event with important clinical implications.
- High-grade transformation (previously called dedifferentiation) in salivary tumors has to be distinguished from the conventional histological grading into low, intermediate and high-grade carcinomas.
- The molecular and genetic mechanisms behind high-grade transformation is at present largely unknown.
- High-grade transformation in salivary adenoid cystic carcinoma drastically increases the risk for neck node metastasis.
- AdCC-HGT requires a different postoperative management strategy than conventional adenoid cystic carcinoma.
- A very generous sampling of the surgical specimen is mandatory in order to detect any small focus of high-grade transformation.

This summary slide represents the opinions of the authors. No funding or sponsorship was received for this study or publication of this article. For a full list of acknowledgments and disclosures for all authors of this article, please see the full text online. © The Author(s) 2015. Creative Commons Attribution Noncommercial License (CC BY-NC).
